# Supplementary material for: The climatic mass balance of Svalbard glaciers: a 10-year simulation with a coupled atmosphere–glacier mass balance model
Source: Copernicus journal article supplement (doi:10.5194/tc-10-1089-2016), 2016-05-25
Supplement: Supplementary file 1 [file tc-10-1089-2016-supplement.pdf]

Supplement of The Cryosphere, 10, 1089–1104, 2016  
<http://www.the-cryosphere.net/10/1089/2016/>  
doi:10.5194/tc-10-1089-2016-supplement  
© Author(s) 2016. CC Attribution 3.0 License.

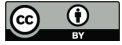

*Supplement of*

## **The climatic mass balance of Svalbard glaciers: a 10-year simulation with a coupled atmosphere–glacier mass balance model**

**Kjetil S. Aas et al.**

*Correspondence to:* Kjetil S. Aas ([k.s.aas@geo.uio.no](mailto:k.s.aas@geo.uio.no))

The copyright of individual parts of the supplement might differ from the CC-BY 3.0 licence.

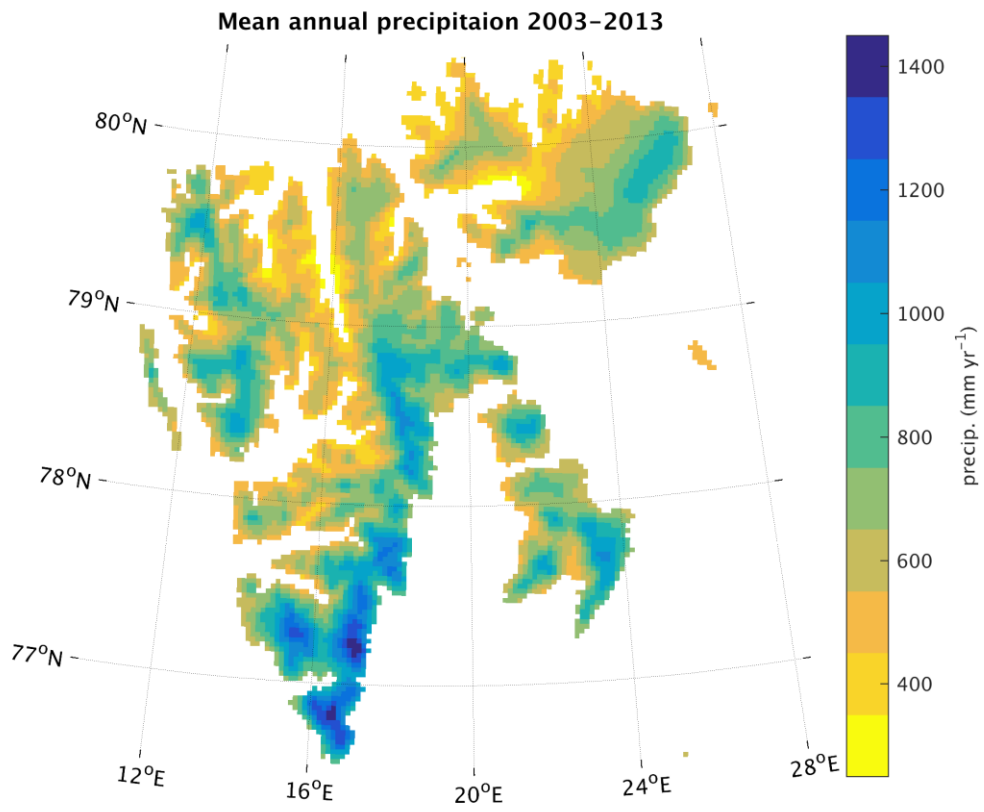

1  
2 Figure S1. Mean annual precipitation (mm yr<sup>-1</sup>) simulated with WRF-CMB from 2003 to  
3 2013.  
4

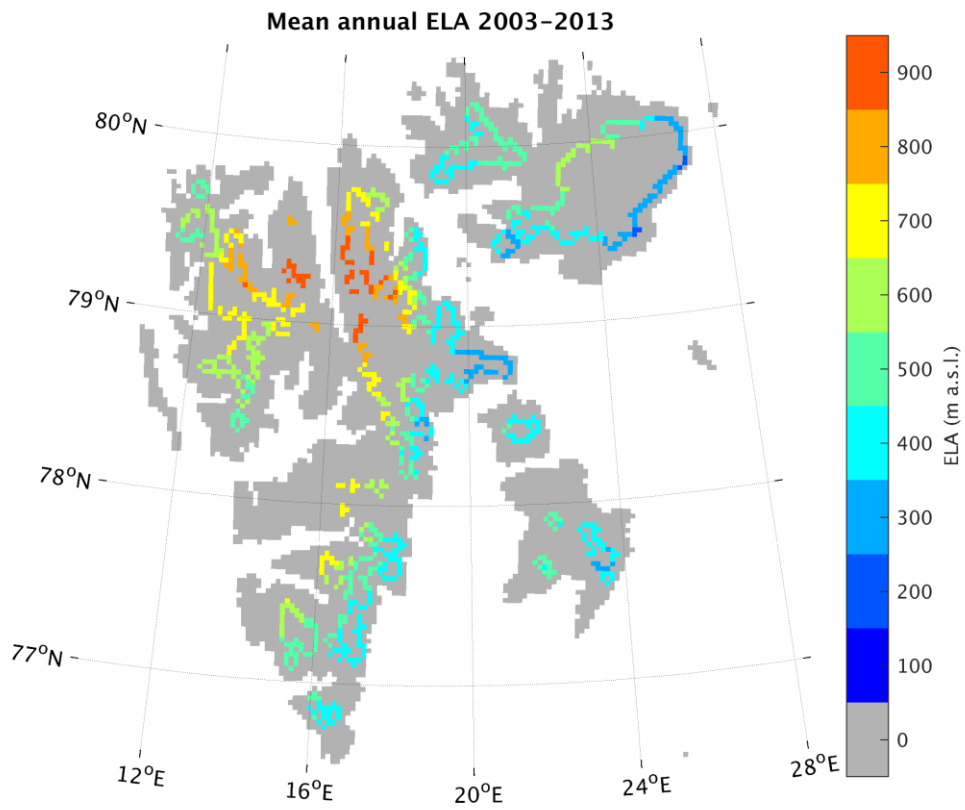

1

2 Figure S2. Mean annual ELA (m a.s.l.) simulated with WRF-CMB from 2003 to 2013.
